# Supplementary material for: Translation of poly(A) tails leads to precise mRNA cleavage
Source: PubMed Central journal article supplement — RNA. 2017 May;23(5):749–61. doi: 10.1261/rna.060418.116 (PMC5393183; doi:10.1261/rna.060418.116), 2017-05

## Supplementary materials for:

Translation of poly(A) tails leads to precise mRNA cleavage  
Guydosh and Green, 2017

## Supplemental Figure Legends

### **Figure S1. Translation of the poly(A) tail leads to widespread upstream mRNA cleavage and ribosome stalling at the 3' ends of the resulting truncated fragments.**

A) Examples of mapped footprints on genes (*GAT2* and *SMX2*) with UAA stop codons and no in-frame stop codons in the 3'UTR. Data reveal enrichment of long reads near poly(A) and short reads over a longer region upstream when *DOM34* is knocked out and the suppressor tRNA is present. In the case of *SMX2*, long reads are somewhat enriched in the absence of the suppressor tRNA (as shown previously (Guydosh and Green, 2014), presumably due to the accumulation of likely non-translating ribosomes. However, short reads do not enrich upstream in this case. Approximate region where polyadenylation takes place is indicated with a dotted arrow.

B) Scatter plot describing effect of knocking out *DOM34* or *SKI2* on ribosome occupancy in 3'UTRs in the presence or absence of *SUP4-o*. Enrichment ratios of short (15-18 nt) reads are plotted as a function of the ratio of long (25-34 nt) reads. Ratios are computed from data on genes with UAA stop codons and no in-frame stop codons in 3'UTRs (*SUP4-o* strains shown in red, dark yellow, and blue) or for all genes (strain where *SUP4-o* is absent shown in gray). Note that when *SUP4-o* is absent (gray dots), the long reads (but not short reads) are enriched in the *dom34Δ* strain as previously observed for likely non-translating ribosomes (Guydosh and Green, 2014).

### **Figure S2. (Short (<10 aa) runs of polybasic residues stall the ribosome but do not trigger significant upstream mRNA cleavage.**

A) Same as Figure 4 for subsets of KKK motifs. Note that the peak in the AAA data for short reads is present in both footprint and mRNA-Seq data, implying it arises due to an artifact and is not reflective of mRNA cleavage.

B) Same as Figure 4 when *DOM34* is present (*ski2Δ* background).

C) Same as Figure 4 for polyarginine residues. Unlike the pausing observed with lysine, pausing with arginine does not suddenly appear when 3 codons are repeated but instead gets larger with the addition of each arginine to the sequence.

### **Figure S3. Translation of poly(A) tails cannot be observed while ORF-internal poly(A) is readily translated.**

A) Histogram of consecutive A count on the 3' ends of footprint reads before any alignments were performed.

B) Ribosome footprints mapped to a reporter construct with 9 consecutive lysines (green box) that are encoded by either all AAA (top) or AAG (bottom) codons. Regions where either short (yellow) or long (brown) reads cannot map due to low complexity of the sequence are indicated

above the plots. All reads normalized to the long-read ribosome occupancy of the *URA3* gene on the reporter plasmid (long and short reads sequenced together from a single library preparation). Data from the AAG reporter was then scaled by a factor of 2.2 so that long-read density was the same as for the AAA reporter. Finally, short reads for both reporters were scaled by a factor of 2 to facilitate easier comparison.

## Strains Used

| Strain ID | Genotype                                                                                                                                                                                                                    | Source                  |
|-----------|-----------------------------------------------------------------------------------------------------------------------------------------------------------------------------------------------------------------------------|-------------------------|
| yNG100    | <i>MAT<math>\alpha</math> his3<math>\Delta</math>1 leu2<math>\Delta</math>0 lys2<math>\Delta</math>0 ura3<math>\Delta</math>0 (ski2::KanMX4)</i>                                                                            | Thermo Scientific       |
| yNG103a   | <i>MAT<math>\alpha</math> his3<math>\Delta</math>1 leu2<math>\Delta</math>0 ura3<math>\Delta</math>0 (ski2::KanMX4) (dom34::KanMX4)</i>                                                                                     | Guydosh and Green, 2014 |
| yNG103b   | <i>MAT<math>\alpha</math> his3<math>\Delta</math>1 leu2<math>\Delta</math>0 met15<math>\Delta</math>0 lys2<math>\Delta</math>0 ura3<math>\Delta</math>0 (ski2::KanMX4) (dom34::KanMX4)</i>                                  | Guydosh and Green, 2014 |
| yNG104    | <i>MAT<math>\alpha</math> his3<math>\Delta</math>1 leu2<math>\Delta</math>0 lys2<math>\Delta</math>0 ura3<math>\Delta</math>0 (ski2::KanMX4) p[SUP4-o, HIS3]</i>                                                            | Guydosh and Green, 2014 |
| yNG107    | <i>MAT<math>\alpha</math> his3<math>\Delta</math>1 leu2<math>\Delta</math>0 met15<math>\Delta</math>0 lys2<math>\Delta</math>0 ura3<math>\Delta</math>0 (ski2::KanMX4) (dom34::KanMX4) p[SUP4-o, HIS3]</i>                  | This study              |
| yNG108    | <i>MAT<math>\alpha</math> his3<math>\Delta</math>1 leu2<math>\Delta</math>0 met15<math>\Delta</math>0 ura3<math>\Delta</math>0 (dom34::KanMX4) p[SUP4-o, HIS3]</i>                                                          | This study              |
| yNG109    | <i>MAT<math>\alpha</math> his3<math>\Delta</math>1 leu2<math>\Delta</math>0 met15<math>\Delta</math>0 ura3<math>\Delta</math>0 p[SUP4-o, HIS3]</i>                                                                          | This study              |
| yNG110    | <i>MAT<math>\alpha</math> his3<math>\Delta</math>1 leu2<math>\Delta</math>0 met15<math>\Delta</math>0 lys2<math>\Delta</math>0 ura3<math>\Delta</math>0 (ski2::KanMX4) (dom34::KanMX4) p[Thrdx-HA-(AAA)9-mCherry, URA3]</i> | This study              |
| yNG111    | <i>MAT<math>\alpha</math> his3<math>\Delta</math>1 leu2<math>\Delta</math>0 met15<math>\Delta</math>0 lys2<math>\Delta</math>0 ura3<math>\Delta</math>0 (ski2::KanMX4) (dom34::KanMX4) p[Thrdx-HA-(AAG)9-mCherry, URA3]</i> | This study              |



TATAATACAGTTTTTTAGTTTTGCTGGCCGCATCTTCTCAAATATGCTTCCCAGCCTGCTTTTCTGTAAAGTTCCACCCTCTACCTTAGCATCCCTTC  
CCTTTGCAAATAGTCCTCTTCCAACAATAATAATGTGAGATCCTGTAGAGACCACATCATCCACGGTTCTATACTGTTGACCCAATGCGTCTCCCTT  
GTCATCTAAACCCACACCGGGTGCATAATCAACCAATCGTAACTTCATCTCTCCACCCATGTCTCTTTGAGCAATAAAGCCGATAACAAAATCT  
TTGTGCGCTCTTCGCAATGTCAACAGTACCCTTAGTATATTCTCCAGTAGATAGGGAGCCCTTGCATGACAATTCTGCTAACATCAAAAAGCCCTCTAG  
GTTCCCTTGTACTTCTTCTGCCGCTGCTTCAAACCGCTAACAAATACCTGGGCCACCACACCGTGTGCATTTCGTAATGTCTGCCCATCTGCTAT  
TCTGTATACACCCGCAGAGTACTGCAATTTGACTGTATTACCAATGTGAGCAAAATTTCTGTCTTCGAAGAGTAAAAAATTTGACTTGGCGGATAAT  
GCCTTTAGCGGCTTAACGTGCGCTCCATGGAAAAATCAGTCAAGATATCCACATGTGTTTTAGTAAACAAATTTGGGACCTAATGCTTCAACTA  
ACTCCAGTAATTCCTTGGTGGTACGAACATCCAATGAAGCACACAAGTTGTTTGTCTTTTCGTGCATGATATTAATAGCTTGGCAGCAACAGGACT  
AGGATGAGTAGCAGCAGTTCCTTATATGTAGCTTTCGACATGATTTATCTTCTGTTTCTGCAGGTTTTTGTCTGTGCAGTTGGGTTAAGAATACT  
GGGCAATTCATGTTTCTTCAACACTACATATGCGTATATATACCAATCTAAGTCTGTGCTCCTTCTTCGTTCTTCTGTTCCGGAGATTACCG  
AATCAAAAAAATTTCAAAGAAACCGAAATCAAAAAAAGAATAAAAAAATGATGAATTGAATTGAAAAGCTGTGGTATGGTGCACCTCTCAGTAC  
AATCTGCTCTGATGCCGCATAGTTAAGCCAGCCCCGACACCCGCCAACACCCGCTGACGCGCCCTGACGGGCTTGTCTGCTCCCGCATCCGCTTAC  
AGACAAGCTGTGACCGTCTCCGGGAGCTGCATGTGTCAGAGTTTTTACCCTCATACCGAAACGCGGA

**Fig. S1**

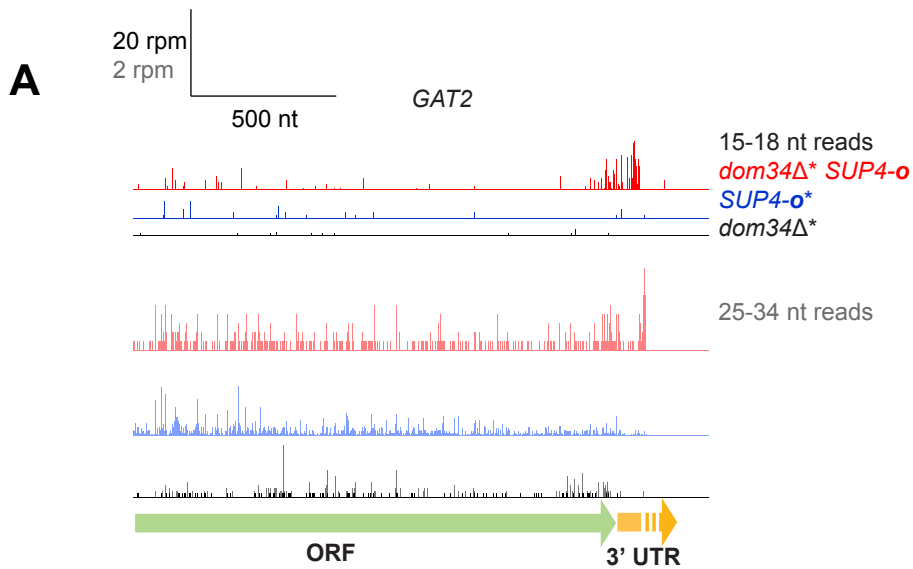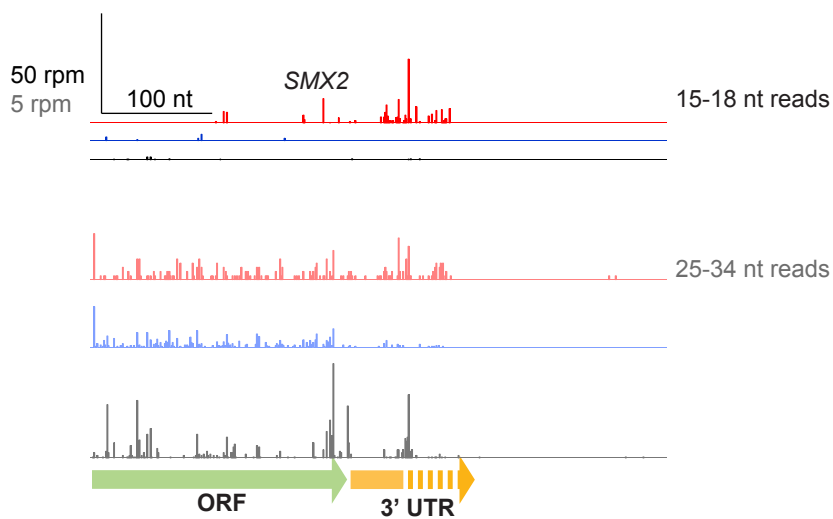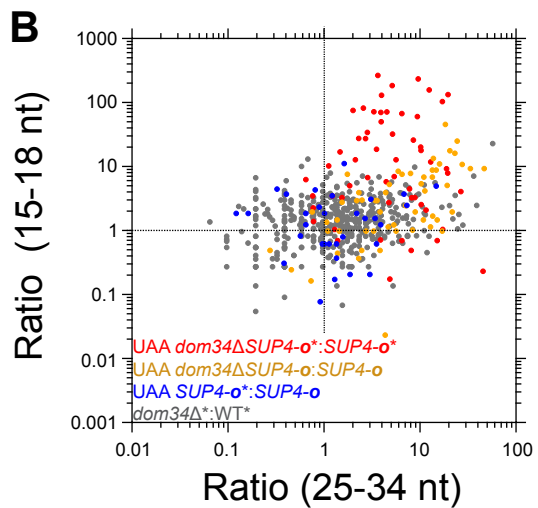

**Fig. S2**

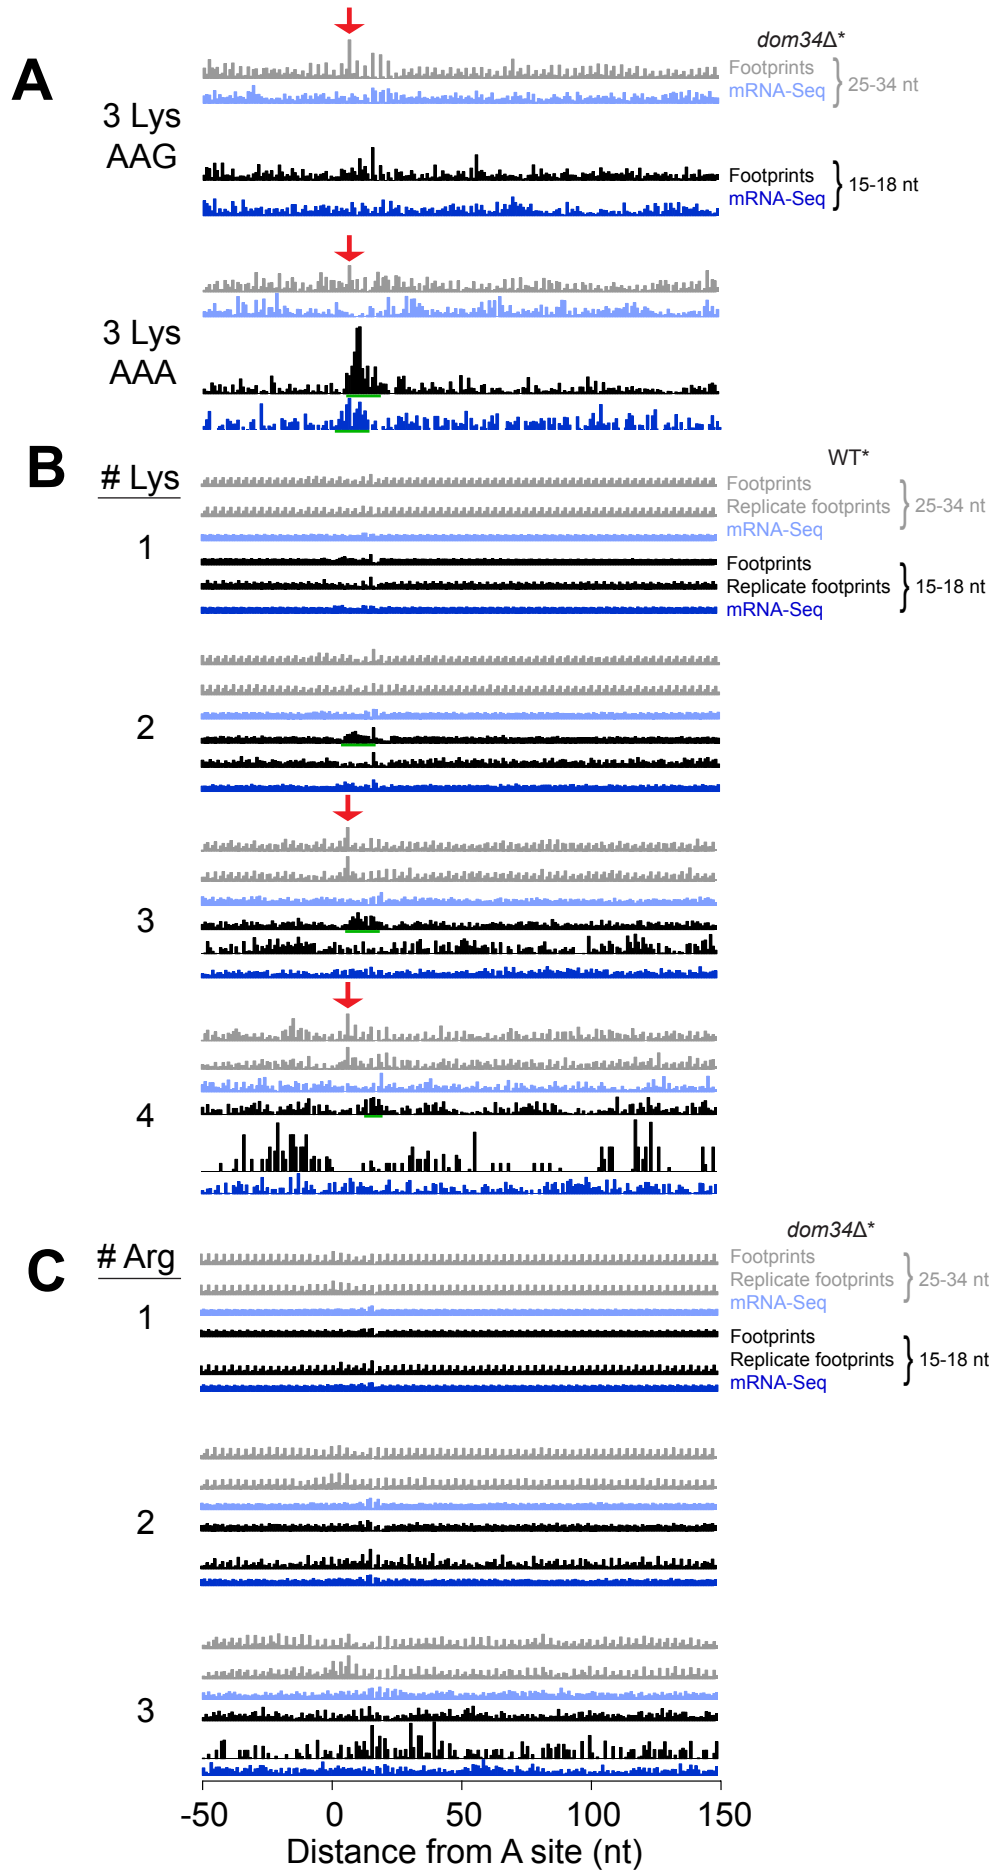

**Fig. S3**

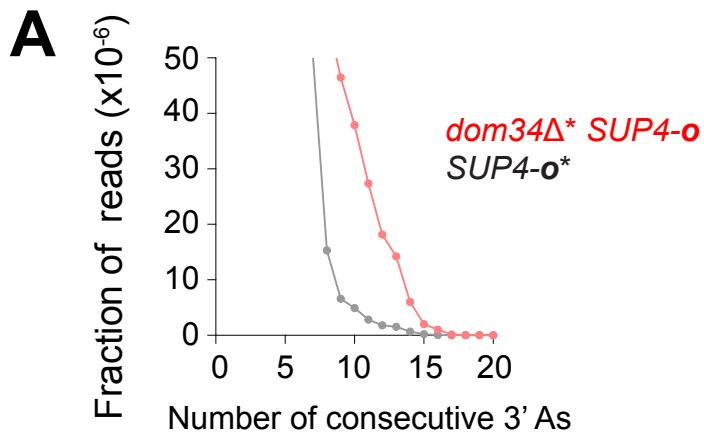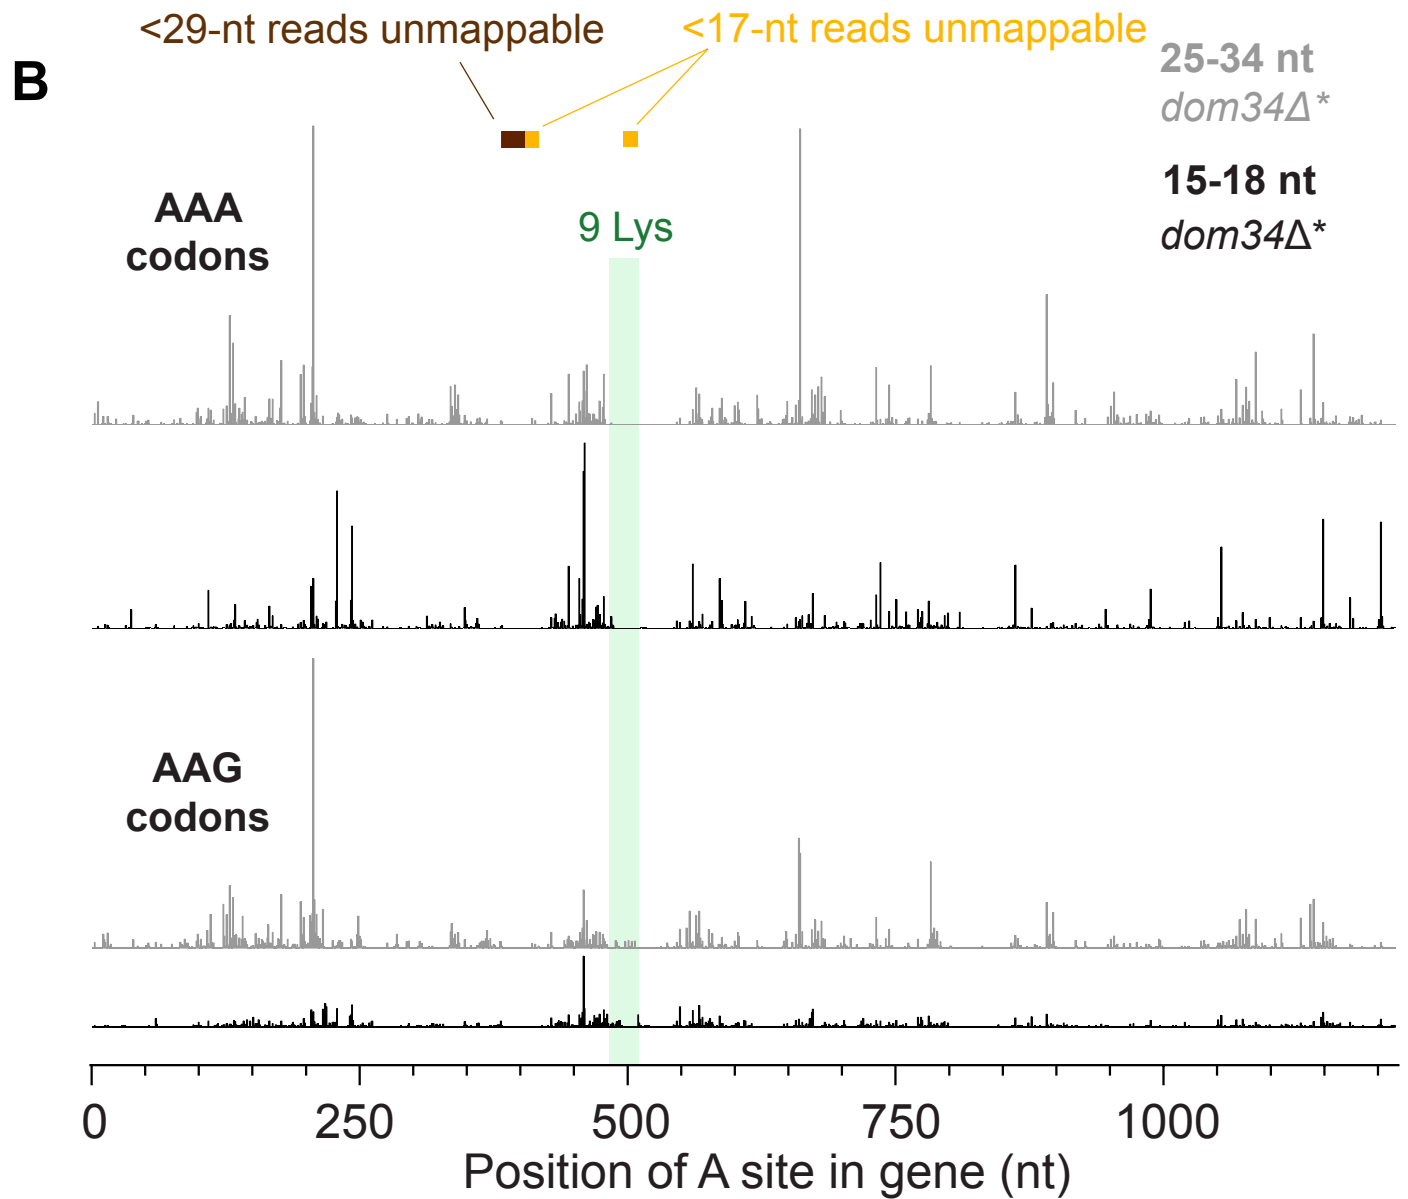

Supplement: supp_060418.116_Supplemental_Material.pdf [file supp_060418.116_Supplemental_Material.pdf]
